# Supplementary material for: Probing the effect of straight chain fatty acids on the properties of lead-containing plexiglass
Source: Royal Society of Chemistry journal article supplement (doi:10.1039/d1re00154j), 2021-01-01
Supplement: d1re00154j1.pdf [file d1re00154j1.pdf]

ESI for

**Probing the effect of straight chain fatty acids on the properties of lead-containing plexiglass**

Yujuan Zhang,<sup>a</sup> Chunhong Wang,<sup>\*a</sup> Defeng Wu<sup>a</sup>, Xintao Guo<sup>b</sup>, Lei Yu<sup>\*a</sup> and Ming Zhang<sup>a</sup>

<sup>a</sup> School of Chemistry and Chemical Engineering, Yangzhou University, Yangzhou, Jiangsu 225002, China. E-mail: yulei@yzu.edu.cn (L. Yu), wangch@yzu.edu.cn (C. Wang)

<sup>b</sup> Department of Materials Research, AVIC Manufacturing Technology Institute, Beijing, China.

**Table of Contents**

|                                                          |    |
|----------------------------------------------------------|----|
| FTIR spectra of the products .....                       | S2 |
| The free volume size of the products .....               | S3 |
| Optical properties of the products .....                 | S4 |
| XRD patterns of the products .....                       | S6 |
| $\gamma$ -ray shielding performance of the products..... | S7 |

## FTIR spectra of the products

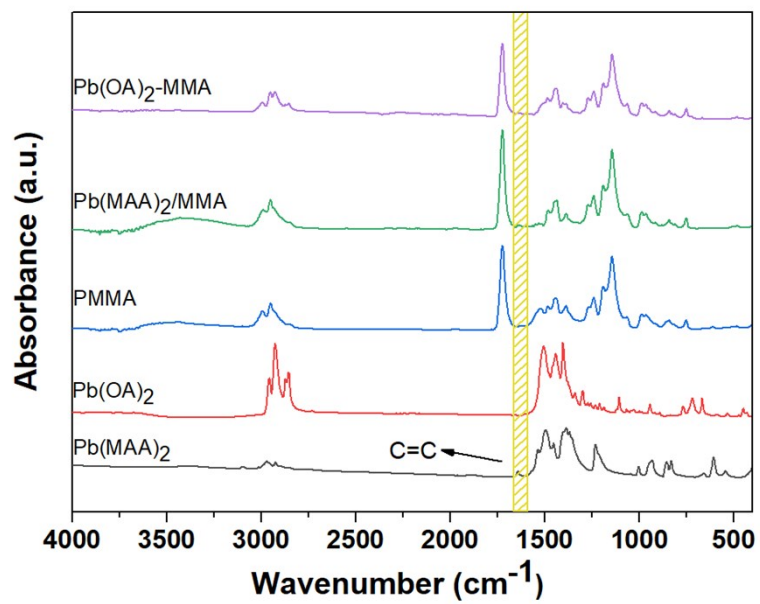

**Fig. S1** FTIR Spectra of the Products

## The free volume size of the products

**Table S1** PALS Data of the products<sup>1</sup>

| Entry | Sample                               | $\tau_3^a$ | $R_3^a$ | $V_f^a$ |
|-------|--------------------------------------|------------|---------|---------|
| 1     | 20%Pb(MAA) <sub>2</sub> /MMA-4phrOA  | 2.04       | 2.89    | 101.04  |
| 2     | 20%Pb(MAA) <sub>2</sub> /MMA-16phrOA | 2.28       | 3.09    | 123.67  |

<sup>a</sup> The unit of  $\tau_3$  (i.e. the third lifetime component),  $R_3$  (i.e. the radius of the free volume cavity) and  $V_f$  (i.e. the volume of free volume cavity) were ns, Å and Å<sup>3</sup> respectively.

$$\tau_3 = \frac{1}{2} \left[ 1 - \frac{R}{R + \Delta R} + \frac{1}{2\pi} \sin \left( \frac{2\pi R}{R + \Delta R} \right) \right]^{-1}$$

$$V_f = \frac{4}{3} \pi R^3$$

$$\Delta R = 1.656 \text{ \AA}$$

## References

1. (a) K. Kato, A. Ohara, K. Michishio and K. Ito, *Macromolecules*, 2020, **53**, 8910; (b) S. K. Sharma and P. K. Pujari, *Prog. Polym. Sci.*, 2017, **75**, 31.

## Optical properties of the products

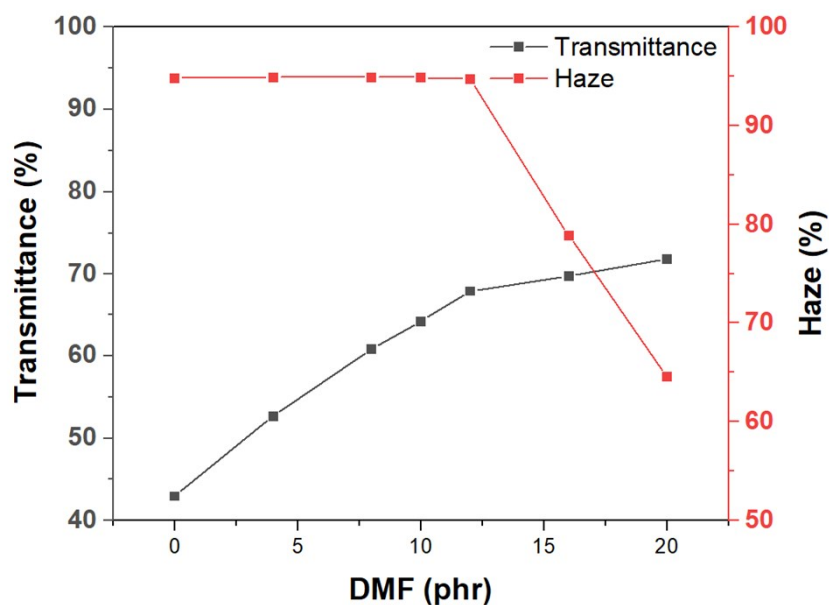

**Fig. S2** The effect of the content of DMF on the optical properties of  $\text{Pb}(\text{MAA})_2$ -containing plexiglasses, in which the mass ratio of  $\text{Pb}(\text{MAA})_2$  and MMA was 20:80.

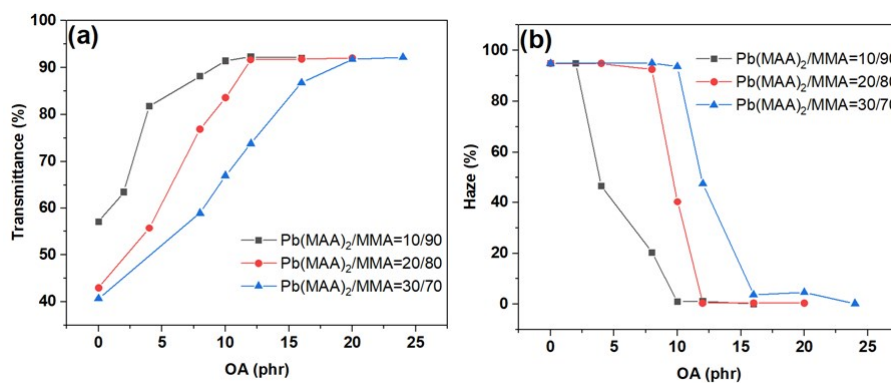

**Fig. S3** The content of OA on the optical properties of  $\text{Pb}(\text{MAA})_2$ -containing plexiglasses with different ratios of  $\text{Pb}(\text{MAA})_2$  and MMA. (a) The light transmittance; (b) the haze.

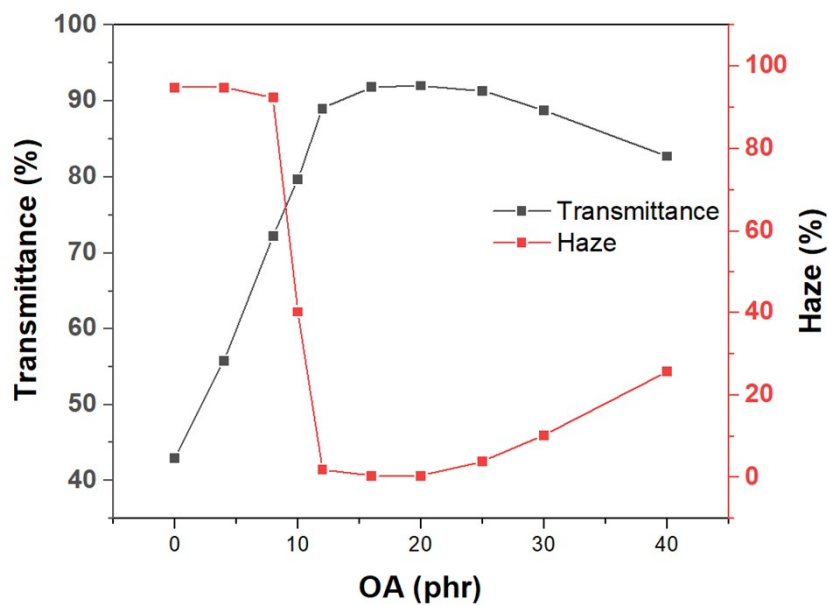

**Fig. S4** The effect of the content of OA on the optical properties of Pb(MAA)<sub>2</sub>-containing plexiglasses, in which the mass ratio of Pb(MAA)<sub>2</sub> and MMA was 20:80.

## XRD patterns of the Products

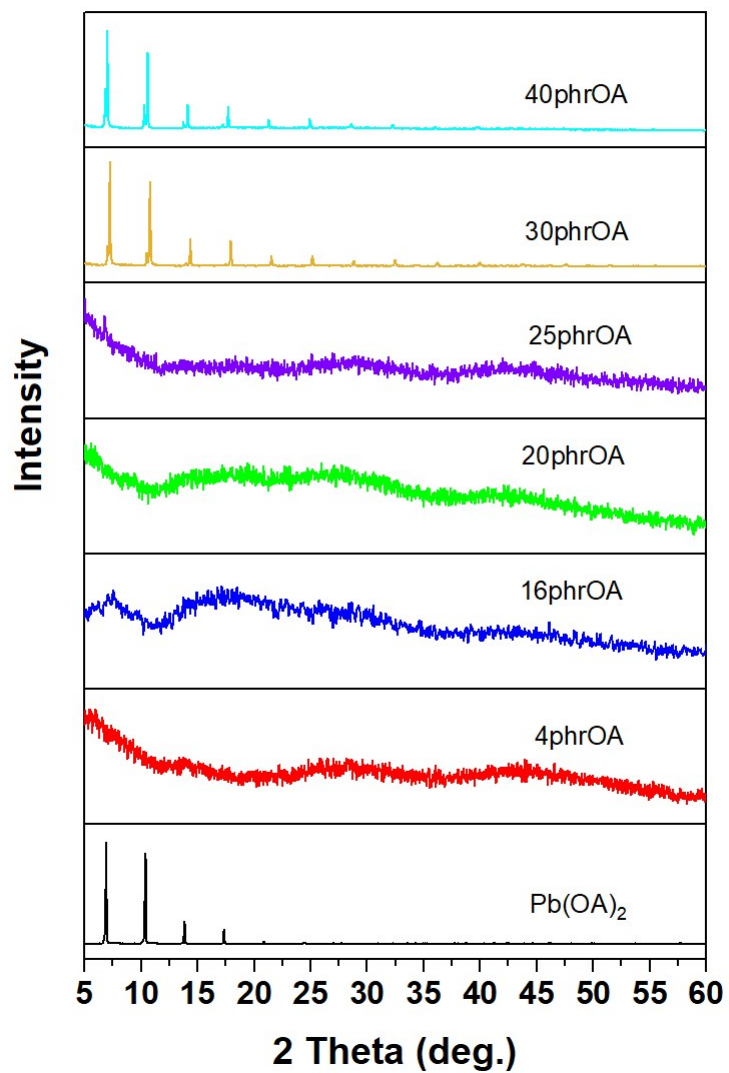

Fig. S5 XRD patterns of the Products

## $\gamma$ -ray shielding performance of the products

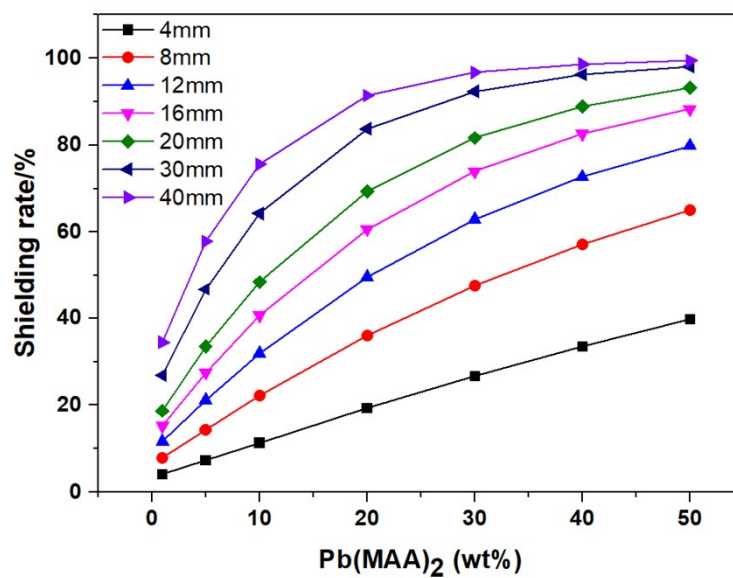

**Fig. S6** The shielding rate of lead-containing plexiglasses against photons with the energy of 100keV.
